# Supplementary material for: In Vitro Antimicrobial Activity of Plant Species against the Phytopathogens Ralstonia solanacearum, Phytophthora infestans, and Neopestalotiopsis javaensis
Source: MDPI journal article supplement (doi:10.3390/agriculture13102029), 2023-10-20
Supplement: s1 [file s1]

>200214-045\_C03\_383\_800R.ab1 3510  
CCCGTGCCGGGTTTTTCGTGCCTGAACGGAGTGTTATCGCAAGGAGGCTG  
CCTTCTTCATCGGTATTCCTCCACATCTCTACTTACTACTGCTACTCGTG  
GAATTCTACCTCCCTCTGACACACCCTATAAAGTGCAGTCACCAATGCAA  
TTCCCAGGTTAAGCCCCGGGGATTTACATCGGTCTTGACAAACCGCCTGC  
GCACGCTTTACGCCCAGTAATTCCGATTAACGCTTGACCCTACGTATTA  
CCGCGGCTGCTGGCACGTAGATAGCCGGTCCTTATTCTTCCGGTACCGAC  
ATCCACCCCACTCTATTAACCGGAAGCTACTTCTCAAACCTGACCAAAAAG  
TGGTCCTACACCCCATGAAACGTACTAAATTCACGGGGTTGCGGCCAATT  
AGGAGGCTATACATGGGATTGCCACACACATATTTCTCCGAAACCAGGTA  
AACACAACATCGCCTGACCCTGGCATAGAAAACCCATGGGGGTGGGGAAG  
CTATTTTTATTCTTTTTTTCTCCGGGAAAACAAAACGAAAACGGGCCTCC  
CTTTTTCTAGTTTTTCAACTAATTCAGGGAGGGGACCATTCCGGCCGCCCG  
GGGGGGAATAGTAGAGTGGGAAAAAAGGGGGGGGTTTTTTTATAACCCCA  
AGGCGGGGTTTATAATAATGCTCCCCCGAGCGAAAAAATTTTTTTAAAAT  
ATTTTCCGGGCCCCCACTACCCATATTATTAATAATAAATCCCCCCAA  
CCCGCGCCCCCGCGCCCCCTCTTCTTATTGTGGGAGGGGGACAGTGGAG  
TGGGTGGGCGTGGCGGGCGCGCCGCCCGCCACCCATCGAAAAGAAGAAA  
AAACACCAGACACCTCAATTATTTTCTTCGCCCCCTTATATATGATAAAA  
AAAGAAATGTACCTCTATCTCCTCTTCATTTTGGGGCGCCTGTCCTCTTT  
TTTTTTGAAGAAAAAATCCTCCCACTACAGGGGGGCGAGAAAAAAATTA  
TTCTTCTCGCCCCCCCCAACATATGGTTGGGGGGGGGAGTGGGAGGGCAA  
CTGCATTGAGAGCCTCCTCCTTCCCACAAACCCCTTCCCCCAGCATATA  
AGAGTGTGGAGTAGTTGCCGCTCCCCCCTACCTTAAAAACCCGCAGCA  
GTAAGAGGGGGGCGGGGGCAAAATATAAATATATCTCCTTACCATACCCC  
CCCCCCCCCGCGCGCGCAGAAAAAACACACCGCCCTATATTGTTGGGAG  
GATAGATTAGAGAGAAGCGAGCCCCCGCATTTATACGCTAGAAAAAATT  
AATAAAGTGGGGGGGTGGGGGGGGCGGGGGAGGGGCGGCAACAAAAAAC  
TCCCATCCAACCCGCGCGGAGAGTAGAGTGTGTGGTGTGAATTAATCT  
ATAAACTGATGAGAGGTAACCACGCACGCCGCTGTTGTTGTGTGTTTGC  
TTCTTTTTTGGTGGGGGAGTGGTCACACAAACCACTCACTACAACACAAAG  
CAGACTATTTCTCTGTGTTTGTATCCGCACTCGCGCGCCCTCTTCAGCAC  
CACTATATATGGGAGAAACACACACCACGCCAGAGACAATAATAAAAA  
GTTGTTTGTGTGTTGTTTGGTGTGTACCTCTCTCCCCCCCACCACCCG  
CACAATAATAGAGAGAGCATAACGGAGGGTGCGTCTGCGTGTTTATTATT  
TTATATAATTCTATATTTATTAATCACAAACAACCACACACACACAGA  
CAGTGTGGGTGTGGGGGGGAGGTATTAGATAATTTATCTTCTCGCTCCAC  
TCCCAACACCCGCCCGCCACGCGCCACACACGCTAACACTACTTATATTA  
TAAACATTATCAGTTCATAGCGGATGAAGAGGGCGCGCGTAGGTGTAGAT  
ATCTATTATCTATACATAATCACAAAACCTCTCTGTGTATGGTGCTCTCTC  
GTCTATATGTCACCAACGGCTGGCGGCGGGGAGGTGATGGGAAGAATAT  
AGAATATAATATTTTTATTTGTTTTTCTCCTGTGCGACACCCTCCTTCTA  
TTCTTATCACTACCCCCACCGCATATCGCTATCCTGAGGGGAGAGAGATA  
ACACACACGATCATTCTATGTATCACCCCAGCTCTGTGCGTCGAAGTGAG  
TGGTGGTGTGAGAAGAGCGTGGTGAGTGGACATATAGTGTAGTCGACCAT  
CTCACACCCACCTCCTACACTATACGTGTGTGGTGTGTGGGAGACGATG  
ATAGAAATAGTATTATCTCTACCCGCACCTCCGCTGAGGCGGAGGCCGCG  
CGTTGTTCTAGAATAGAAACATCACAAAACATATCATCCGCCACTGAGTG  
GGAGGGAGAGAGAAGTGATTCAATTCTATCTTCTATTAACCAGCAGATGAA  
TATATATAAATATTTGCGTGTTGTTGCGATGCTCTGTTGTGTGGTAGAGT  
GAGACAAGACGAACACACACAACCAACGCCGCGCGGAGCGCGACTCGA  
ATTCGTGAAAGGAGATGAGTACGCAGCCAGCGTGTGTGCGAGCGCAGTTAA  
TTTATTTTTATTATAGTGACATACACTCACCGCCTCCGCGAGCGCCGCGG  
ACAATAATGTATATTTATATATATATATATTTTTATTCTCTACACACCAGG

AGGTAATATTTGTAAATTTATAAGAGACAGACGCCGCAGCGCGCGTGCTG  
GTGAGTGAAGGAGGGATAGCAACACAGCACCTCTCCTCTCTCTCATTTT  
GTAGTCATCTCTACTTATATATATTTTTCTTTCCTACTCTTCTCGTGCGCT  
CTGCGTGGGAGAGTGAGTAGAAGATGGCGTTTGAGTCGTGTGTGTGGCGT  
CGTCGCCTAGCGAGATGATGTGACGTAATACACACACACATCAGATCTGA  
GATAAGATATGTGTGTATCGTGATAGAAGACGCAATCAGTGGGACGTCTG  
CTGTGTCTCTCTCTCTCTTTATTATATAATATTATAATTGTTCTCTCTTC  
ACCTCCTCTGCTATCTCACAGGTGAGGAGAGACAAACACACACACGAAGA  
CGCAGAGTATTATAAACACTACCGCTCTCGCTCACCGACACACCACCCAC  
CTCACCCACACGACGCTGGTAGGGGTGTGTGTTAGATGATGTTTTTTTTTC  
GATCAAATCAACTCTCTGGCGAGGAGAAGAAATAGTATGTGTAGATGCAG  
TCTATTCTCTTTCTCTCTCTTTATCCTCTCTCTCTTCTCCTCGGGGC  
GAGAGAGAAAGACAACACAACAAATATGAGAAGGAAGATAGATGGTGTAT  
GTGTTGTTTCTGTTGGATGTGTAGTAACATGTCTACGACTCACCACCACC  
AGGACAAACAGACAGCAAGAACGCGATGGCGCGTCGCTCCTCTTCTTCTC  
CATCTCTCTCACTTTACTCAGCGCAACCACCACCAACACTATCACACGCA  
CAGCGCCGCTGCGCGTGTGGGAGAGGTGGAGTTTATCTATATCTCGCTAG  
GCACGACGGG
