# Supplementary material for: In Vitro Antimicrobial Activity of Plant Species against the Phytopathogens Ralstonia solanacearum, Phytophthora infestans, and Neopestalotiopsis javaensis
Source: MDPI journal article supplement (doi:10.3390/agriculture13102029), 2023-10-20
Supplement: s1 [file s1]

>Contig[0001]

CATGTATAGCCTCCTAATTGGCCGCAACCCCGTGAATTTAGTACGTTTCA  
TGGGGTGTAGGACCACTTTTTGGTCAGTTTGAGAAATCGCTTC:GGTTAA  
TA:CCTGGGGTGGATGACGGTACCGGAAGAATAAGGACCGGCTAACTACG  
TGCCAGCAGCCGCGGTAATACGTAGGGTCCAAGCGTTAATCGGAATTACT  
GGGCGTAAAGCGTGCGCAGGCGGTTGTGCAAGACCGATGTGAAATCCCCG  
GGCTTAACCTGGAATTGCATTGGTGA CTGCACAGCTAGAGTGTGTCAGA  
GGGAGGTAGAATTCCACGTGTAGCAGTGAAATGCGTAGAGATGTGGAGGA  
ATACCGATGGCGAAGGCAGCCTCCT:GGGATAACACTGACGCTCATGCAC  
GAAAGCGTGGGGAGCAAACAGGATTAGATACCCTGGTAGTCCACGCCCTA  
AACGATGTCAACTAGTTGTTGGGGATTCATTTCTTAGTAACGTAGCTAA  
CGCGTGAAGTTGACCGCCTGGGGAGTACGGTCGCAAGATTAAACTCAA  
GGAATTGACGGGGACCCGCACAAGCGGTGGATGATGTGGATTAATTACAA  
GCATCA
