# Supplementary material for: In Vitro Antimicrobial Activity of Plant Species against the Phytopathogens Ralstonia solanacearum, Phytophthora infestans, and Neopestalotiopsis javaensis
Source: MDPI journal article supplement (doi:10.3390/agriculture13102029), 2023-10-20
Supplement: s1 [file s1]

>200214-045\_A03\_383\_518F.ab1 1405

AGAACACGTATCGGATTACTGGGCGTAAGCGTGCGCAGGCGGTTGTGCAA  
GACCGATGTGAAATCCCCGGGCTAAAAAATAGAATTGCATTGGTGACTGC  
ACAGCTAGAGTGTGTCAGAGGGAGGTAGAATTCCACGTGTAGCAGTGAAA  
TGCGTAGAGATGTGGAGGAATACCGATGGCGAAGGCAGCCTCCTGGGATA  
ACACTGACGCTCATGCACGAAAGCGTGGGGAGCAAACAGGATTAGATACC  
CTGGTAGTCCACGCCCTAAACGATGTCAACTAGATGTTGGGGATTCAATTT  
CCTTAGTAACGTAGCTAGCGCGTGAAGTTGACCGCCTGGGGAGCACTGTC  
GCAAGATTAACACTCAGAGGAATTGACGGGGACCCGTTCAAGCGGCGGAT  
CATGTGGATAAATTACAAGCATCATGTAAACCTGGGGGAACTTTTTCTT  
TTCAGCAAAAAATGCGTCTTCTGTTTTCTTGGTGGAAGTTAAAGGGAGA  
AGAGGGGTTTTTTGGCTTGATCCTAATATTTATTTTCATCAAACCACGGGG  
TTTGGGGGGGGGGCCCGTCTAATTCTTTTTTGAGAATTTTAATAGTTTTT  
GGATCTGGGTCTCCCCATAGGGGAGAATCATTTCTCCCTTTATGTTATA  
CTAATCTTGAGGAAAAAATTTCCCCCCAGGCTACATTGGCATCCGTTTT  
TTAGGGGGGGGGGGGAAATTACCGGGGGGTATACCTTTCTTTTGTTTTCG  
TCCCAACTCTTCTTTGCTGGTTAAGGGCGTGGTAAGGTGGTGGCTCAGGA  
GAGAGGGGGTGTTTTTTACCACCTCCGGGGTTTATTTCCCCACTCCTTCT  
TATTTAGAAAAGTTTTTTTTTTTTGTGGGGGTGATGGGGGGGAGTTTTTT  
TTTCTCTCTCTCGGTGGACAATGCCTTATTTGGGGTGGGTGTGAGGCC  
CCCCCCTTGGGGGGATATTTCCGGGGGGTGAATTCGGGGGGGGGGGGGTA  
TTTTTTTTTAATAATTTTGTGTTGTTTGCCGACACCCCCGCTCCTCGG  
GGGGGGGTTTGGTTTTTATGTTTGCGTGATAGATATATTTTTTTCTAGA  
TATTCTTAATATGGGGGTGGGGGGAGAAAACCCTTTTTTTTAATTTTTAT  
TTTAACCTGGGGAGGGGTGGGGTGTGGGTGGCGTTAAAAACAATATATTA  
TTTTTAAGAAGCAGGTGGGGCATTTATTTTTTTTTTTTTTTTGCTCGGGAG  
AAAAGAAGGAAATTTCCGTGCCACACCGCCTGGAGGGTTATTTTTTTCAC  
CCAGCAGGGAAGTGGTTTTTATTTTTTTTTTTTTTTTCGCGAGAGGAGAAA  
AAAAAAAAGGGGTGTTTTTTTACTGCCACTACAAACAGGAGAAAAATGG  
CTCCC
