# Supplementary material for: In Vitro Antimicrobial Activity of Plant Species against the Phytopathogens Ralstonia solanacearum, Phytophthora infestans, and Neopestalotiopsis javaensis
Source: MDPI journal article supplement (doi:10.3390/agriculture13102029), 2023-10-20
Supplement: s1 [file s1]

File: 383\_518F.ab1 Run Ended: 2020/2/18 0:20:42 Signal G:929 A:1197 C:1390 T:1368  
 Sample: 383\_518F Lane: 16 Base spacing: 16.918411 1405 bases in 19397 scans Page 1 of 2

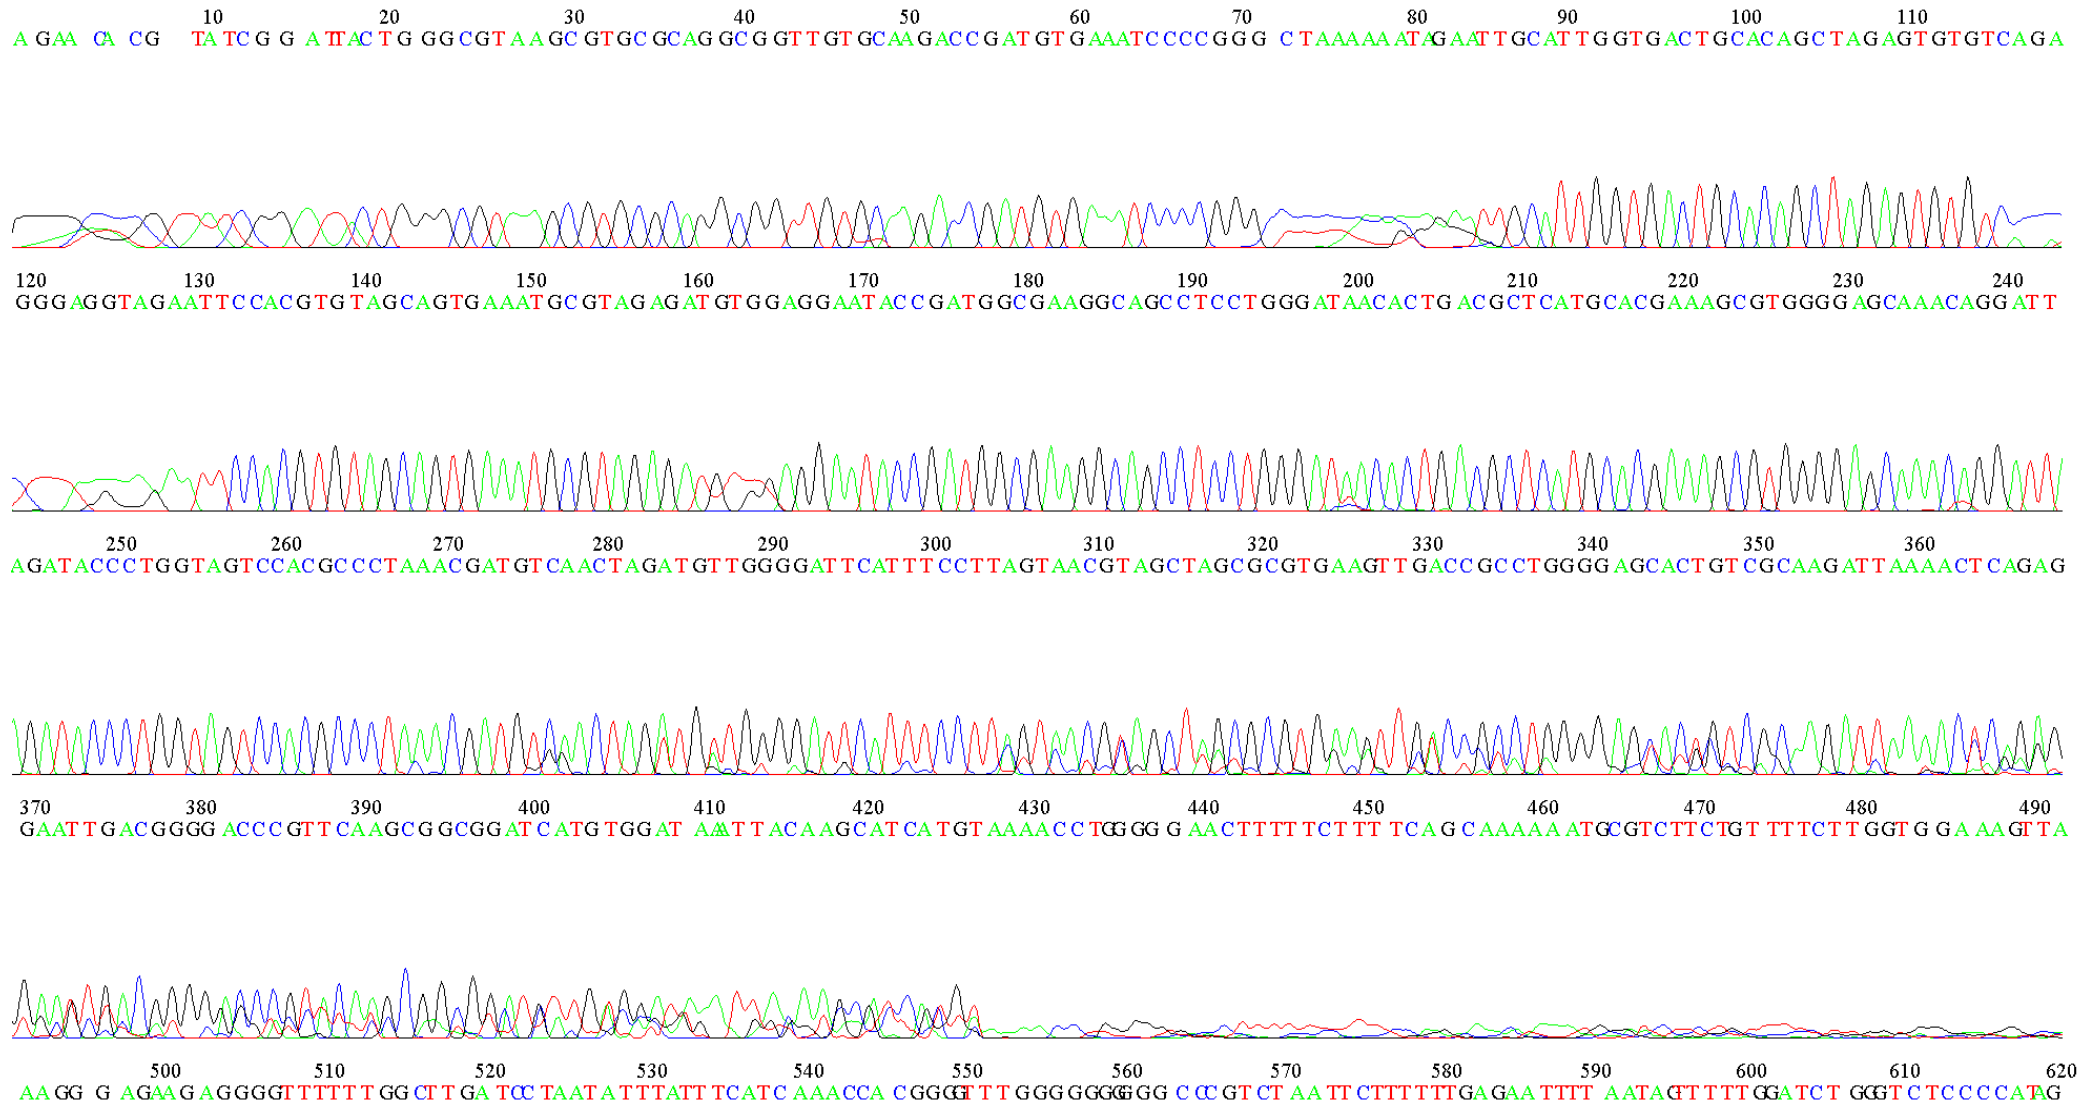

File: 383\_518F.ab1 Run Ended: 2020/2/18 0:20:42 Signal G:929 A:1197 C:1390 T:1368

Sample: 383\_518F Lane: 16 Base spacing: 16.918411 1405 bases in 19397 scans Page 2 of 2

630 640 650 660 670 680 690 700 710 720 730 740  
GGGAGATCATTTCCTCCCTTTATGTTATAC TATC TTGAGGAAAAATTTCCCCCAGGC TACATTGCCA TCCGTTTTTTAGGGGGGGGGGAAATTACC GGGGGGTTAT A CTTTCTTT

750 760 770 780 790 800 810 820 830 840 850 860  
TGTTTTCTCCCA ACTCTT CTTTGCTGG TTAAGGGCGTGG TAAAGGTGTT GGTCAGGA GAGAGGGG GTGTT TTTTA C CACCTCCGGGTTTATTTCC C CACT CTTCTTATTTAG AAAA

870 880 890 900 910 920 930 940 950 960  
GTTTTTTT TTTTGTGG GGTGA TG GGGGGG GAG TTTT TTTTC TCTCTCTCT C GGTGG AC AATGCCTT A TT T GGGG T GG GTG AG G CCC C C CC CTT GGGGG ATA T

970 980 990 1000 1010 1020 1030 1040 1050 1060  
TT CC GGGGGGT G AATT C GGGGGGGGGGTATTTT TTTT AA T AAT T TTG TT GT TGT T G CCGACA C CCCCC GCTCCCT GGG GGGG GTT T G G

1070 1080 1090 1100 1110 1120 1130 1140  
TTTTTAT GT T TG GCGTGAT A GATAT AT TTT TTT C T A GATA TT CT TAA TA TG GG GTT GGG GGG A GAAAA CC CTTT T TTT T A A TTT TTT
