# Supplementary figures and images for: In Vitro Antimicrobial Activity of Plant Species against the Phytopathogens Ralstonia solanacearum, Phytophthora infestans, and Neopestalotiopsis javaensis
Source: MDPI journal article supplement (doi:10.3390/agriculture13102029), 2023-10-20

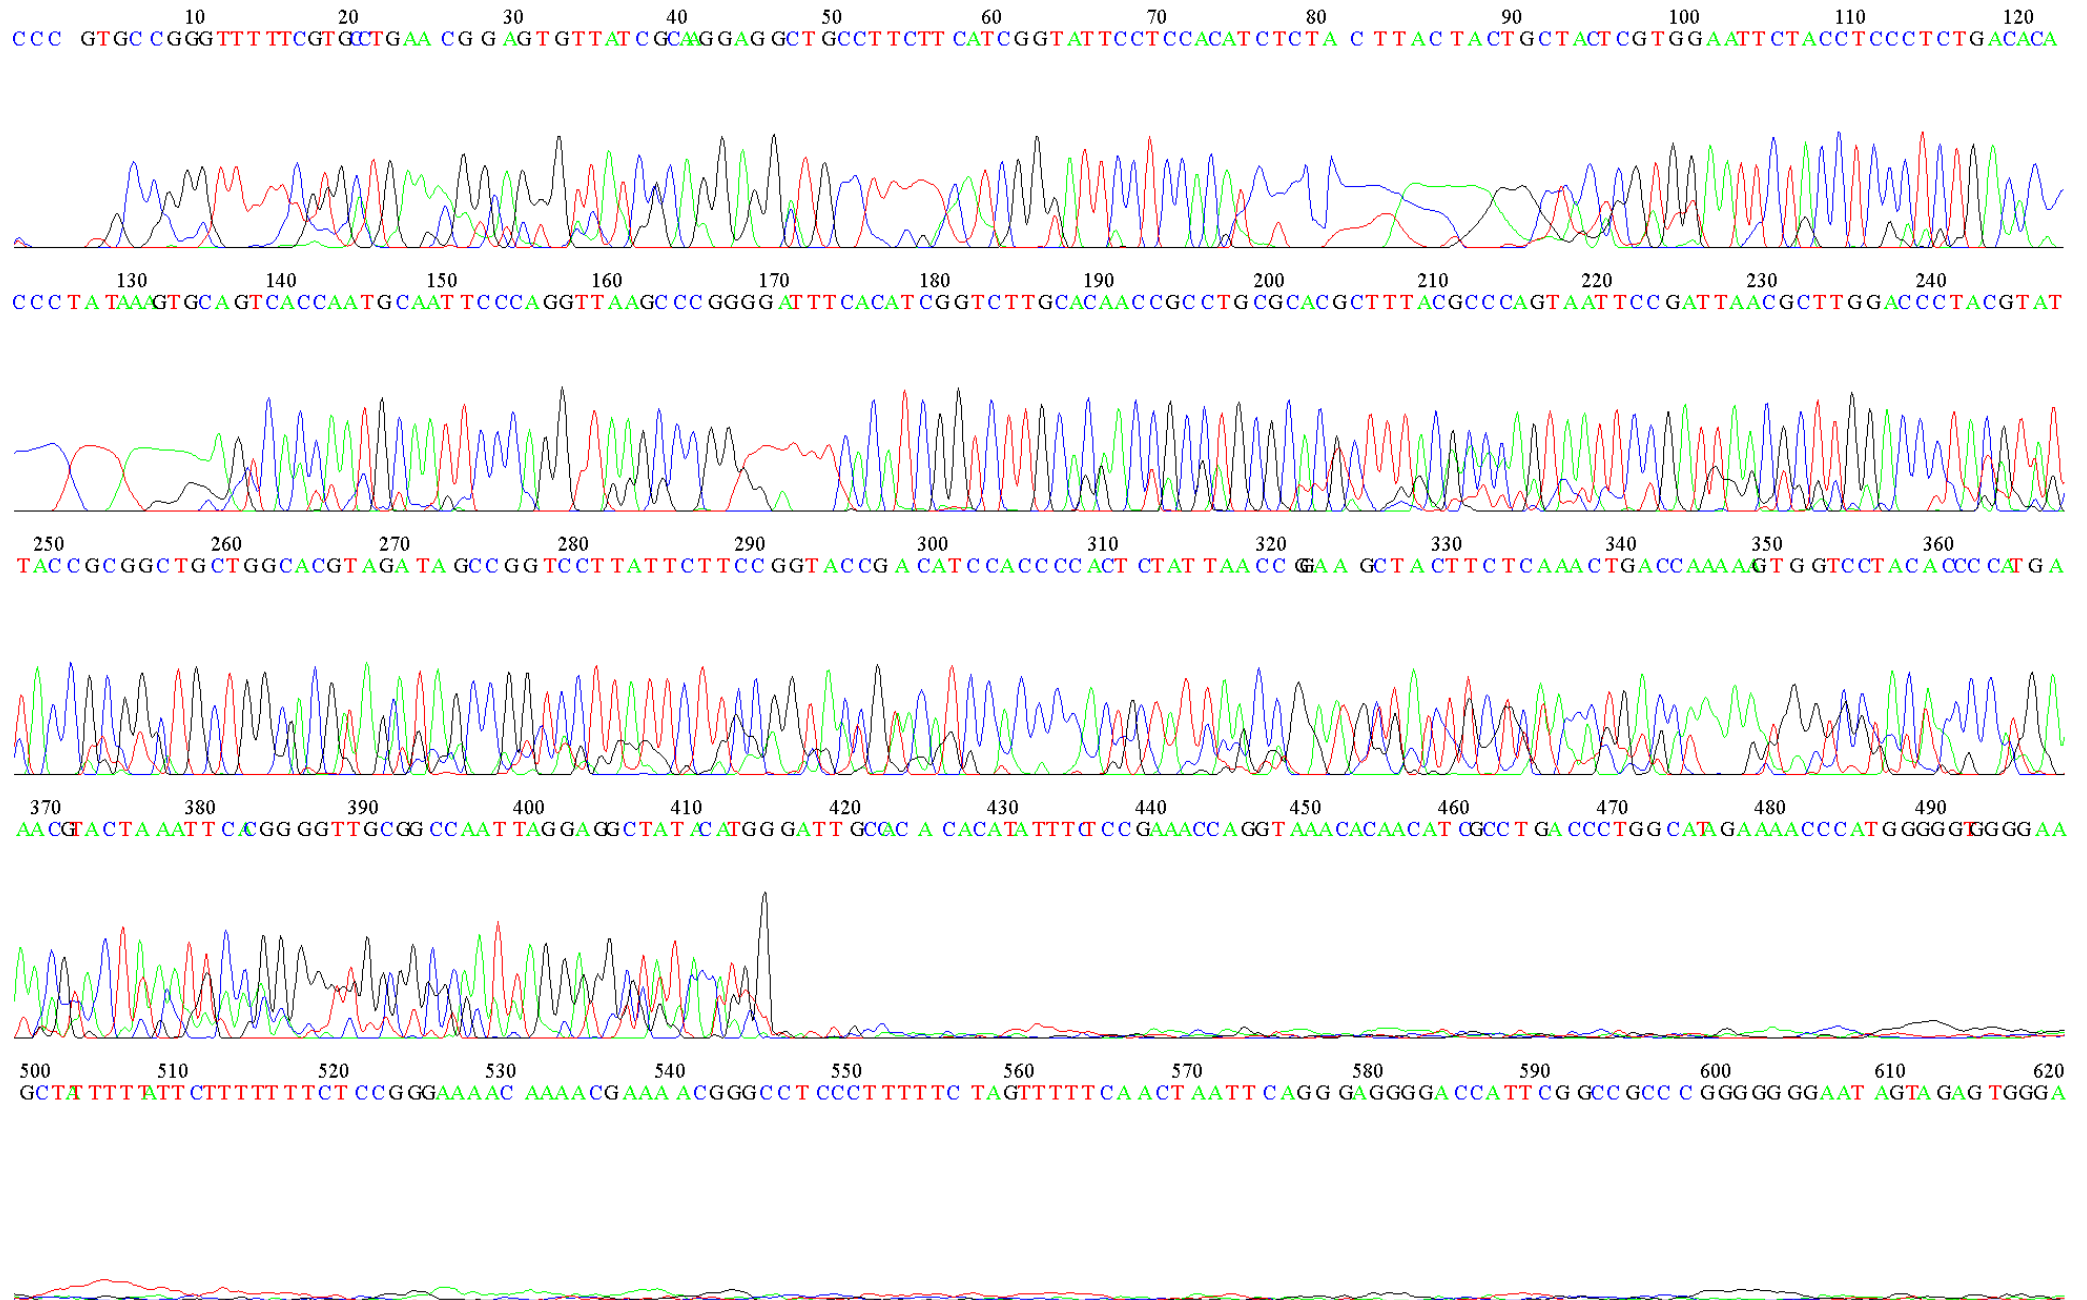

Supplement: s1 [file s1]
